# Supplementary material for: Evaluation of a Rapid Antigen Test To Detect SARS-CoV-2 Infection and Identify Potentially Infectious Individuals
Source: PubMed Central journal article supplement (PMC8373008; doi:10.1128/jcm.00896-21), 2021-08-18
Supplement: jcm.00896-21-s0001.pdf [file jcm.00896-21-s0001.pdf]

|                     |     | <b>Total</b>           | <b>PCR<sup>+</sup></b>     | <b>PCR<sup>-</sup></b>     | <b>p-value</b>       |
|---------------------|-----|------------------------|----------------------------|----------------------------|----------------------|
| N                   |     | 2,028                  | 210<br>(10.36%)            | 1,818<br>(89.64%)          | -                    |
| Median Age<br>(IQR) |     | 32.25<br>(26.15-43.12) | 31.55<br>(24.40 - 46.47)   | 32.36<br>(26.31 - 42.86)   | -                    |
| Sex                 | m   | 789<br>(38.91%)        | 89<br>(42.38%)             | 700<br>(38.50%)            | 0.2954<br>(0.1166)   |
|                     | w   | 1,239<br>(61.09%)      | 121<br>(57.62%)            | 1,118<br>(61.50%)          |                      |
| N                   |     | 1,676                  | 210                        | 1,466                      | -                    |
| Symptomatic         | yes | 866<br>(51.67%)        | 130<br>(61.90%)            | 736<br>(50.20%)            | 0.0015<br>(0.0013)   |
|                     | no  | 810<br>(48.33%)        | 80<br>(38.10%)             | 730<br>(49.80%)            |                      |
|                     |     | <b>Total</b>           | <b>RADT<sup>+</sup></b>    | <b>RADT<sup>-</sup></b>    | <b>p-value</b>       |
| N                   |     | 2,028                  | 92<br>(4.54%)              | 1936<br>(95.46%)           | -                    |
| Median Age<br>(IQR) |     | 32.25<br>(26.15-43.12) | 31.71<br>(24.33-49.79)     | 32.28<br>(26.17-42.87)     | -                    |
| Sex                 | m   | 789<br>(38.90%)        | 43<br>(46.74%)             | 746<br>(38.53%)            | 0.1257<br>(0.0945)   |
|                     | w   | 1,239<br>(61.10%)      | 49<br>(53.26%)             | 1190<br>(61.47%)           |                      |
| N                   |     | 1676                   | 92                         | 1584                       | -                    |
| Symptomatic         | yes | 866<br>(51.67%)        | 73<br>(79.35%)             | 793<br>(50.06%)            | <0.0001<br>(<0.0001) |
|                     | no  | 810<br>(48.33%)        | 19<br>(20.65%)             | 791<br>(49.94%)            |                      |
|                     |     | <b>Total</b>           | <b>culture<sup>+</sup></b> | <b>culture<sup>-</sup></b> | <b>p-value</b>       |
| N                   |     | 118                    | 29<br>(24.58%)             | 89<br>(75.42%)             | -                    |
| Median Age<br>(IQR) |     | 32.12<br>(25.61-46.47) | 40.65<br>(30.01-52.15)     | 31.38<br>(25.52-44.84)     | -                    |
| Sex                 | m   | 46<br>(38.98%)         | 15<br>(51.72%)             | 31<br>(34.83%)             | 0.1270<br>(0.1133)   |
|                     | w   | 72<br>(61.02%)         | 14<br>(48.28%)             | 58<br>(65.17%)             |                      |
| N                   |     | 118                    | 29                         | 89                         | -                    |
| Symptomatic         | yes | 72<br>(61.02%)         | 20<br>(68.97%)             | 52<br>(58.43%)             | 0.3833<br>(0.8183)   |
|                     | no  | 46<br>(38.98%)         | 9<br>(31.03%)              | 37<br>(41.57%)             |                      |

**Table S1. Additional cohort description.** Test results by age, sex and symptoms (weighted analyses for repeated measures in brackets; all p-values by Fisher's exact test).

|                                                    |         | <b>Total</b>     | <b>RADT<sup>+</sup></b> | <b>RADT<sup>-</sup></b> | <b>p-value</b>       |
|----------------------------------------------------|---------|------------------|-------------------------|-------------------------|----------------------|
| N                                                  |         | 1676             | 92                      | 1584                    | -                    |
| Symptomatic                                        | yes     | 866              | 73                      | 793                     | <0.0001              |
|                                                    | no      | 810              | 19                      | 791                     | (<0.0001)            |
| N                                                  |         | 846              | 63                      | 783                     | -                    |
| Cough                                              | yes     | 347<br>(41.02%)  | 37<br>(58.73%)          | 310<br>(39.59%)         | 0.0034<br>(0.0059)   |
|                                                    | no      | 499<br>(58.98%)  | 26<br>(41.27%)          | 473<br>(60.41%)         |                      |
| Fever                                              | yes     | 101<br>(11.94%)  | 24<br>(38.10%)          | 77<br>(9.83%)           | <0.0001<br>(<0.0001) |
|                                                    | no      | 745<br>(88.06)   | 39<br>(61.90%)          | 706<br>(90.17%)         |                      |
| Rhinitis                                           | yes     | 466<br>(55.08%)  | 41<br>(65.08%)          | 425<br>(54.28%)         | 0.1141<br>(0.1806)   |
|                                                    | no      | 380<br>(44.92%)  | 22<br>(34.92%)          | 358<br>(45.72%)         |                      |
| Loss of taste/smell                                | yes     | 83<br>(9.81%)    | 21<br>(33.33%)          | 62<br>(7.92%)           | <0.0001<br>(<0.0001) |
|                                                    | no      | 763<br>(90.19%)  | 42<br>(66.67%)          | 721<br>(92.08%)         |                      |
| Headache                                           | yes     | 503<br>(59.46%)  | 49<br>(77.78%)          | 454<br>(57.98%)         | 0.0020<br>(0.0024)   |
|                                                    | no      | 343<br>(40.54%)  | 14<br>(22.22%)          | 329<br>(42.02%)         |                      |
| Sore throat                                        | yes     | 512<br>(60.52%)  | 35<br>(55.56%)          | 477<br>(60.92%)         | 0.4232<br>(0.3407)   |
|                                                    | no      | 334<br>(39.48%)  | 28<br>(44.44%)          | 306<br>(39.08%)         |                      |
| Limb pain                                          | yes     | 205<br>(24.23%)  | 28<br>(44.44%)          | 177<br>(22.61%)         | 0.0003<br>(0.0003)   |
|                                                    | no      | 641<br>(75.77%)  | 35<br>(55.56%)          | 606<br>(77.39%)         |                      |
| Respiratory problems                               | yes     | 48<br>(5.67%)    | 4<br>(6.35%)            | 44<br>(5.62%)           | 0.7757<br>(0.7736)   |
|                                                    | no      | 798<br>(94.33%)  | 59<br>(93.65%)          | 739<br>(94.38%)         |                      |
| Diarrhea                                           | yes     | 97<br>(11.47%)   | 9<br>(14.29%)           | 88<br>(11.24%)          | 0.4167<br>(0.6733)   |
|                                                    | no      | 749<br>(88.53%)  | 54<br>(85.71%)          | 695<br>(88.76%)         |                      |
| N                                                  |         | 860              | 70                      | 790                     | -                    |
| Days since symptom onset                           | 0-2 d   | 494<br>(57.44%)  | 45<br>(64.29%)          | 449<br>(56.84%)         | 0.2213<br>(0.2597)   |
|                                                    | 3-7 d   | 299<br>(34.77%)  | 23<br>(32.86%)          | 276<br>(34.94%)         |                      |
|                                                    | 8-14 d  | 67<br>(7.79%)    | 2<br>(2.86%)            | 65<br>(8.23%)           |                      |
| prior test result<br>(within 8 weeks before study) | yes     | 666<br>(32.84%)  | 17<br>(18.48%)          | 649<br>(33.52%)         | 0.0021<br>(0.0060)   |
|                                                    | unknown | 1362<br>(67.16%) | 75<br>(81.52%)          | 1287<br>(66.48%)        |                      |

**Table S2. RADT results by symptoms and follow-up testing** (weighted analyses for repeated measures in brackets; all p-values by Fisher's exact test).

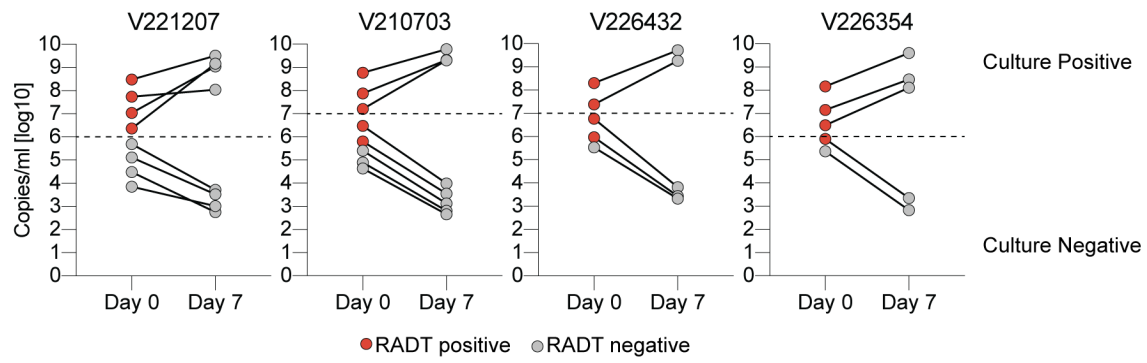

**Fig. S1. Virus cultivation of 1:5 dilutions.**

Samples of four different individuals with high viral loads were diluted and subsequently used for RADT testing and virus cultivation. Culture supernatant was tested in RT-qPCR on the day of inoculation and day 7 for detection of virus replication.

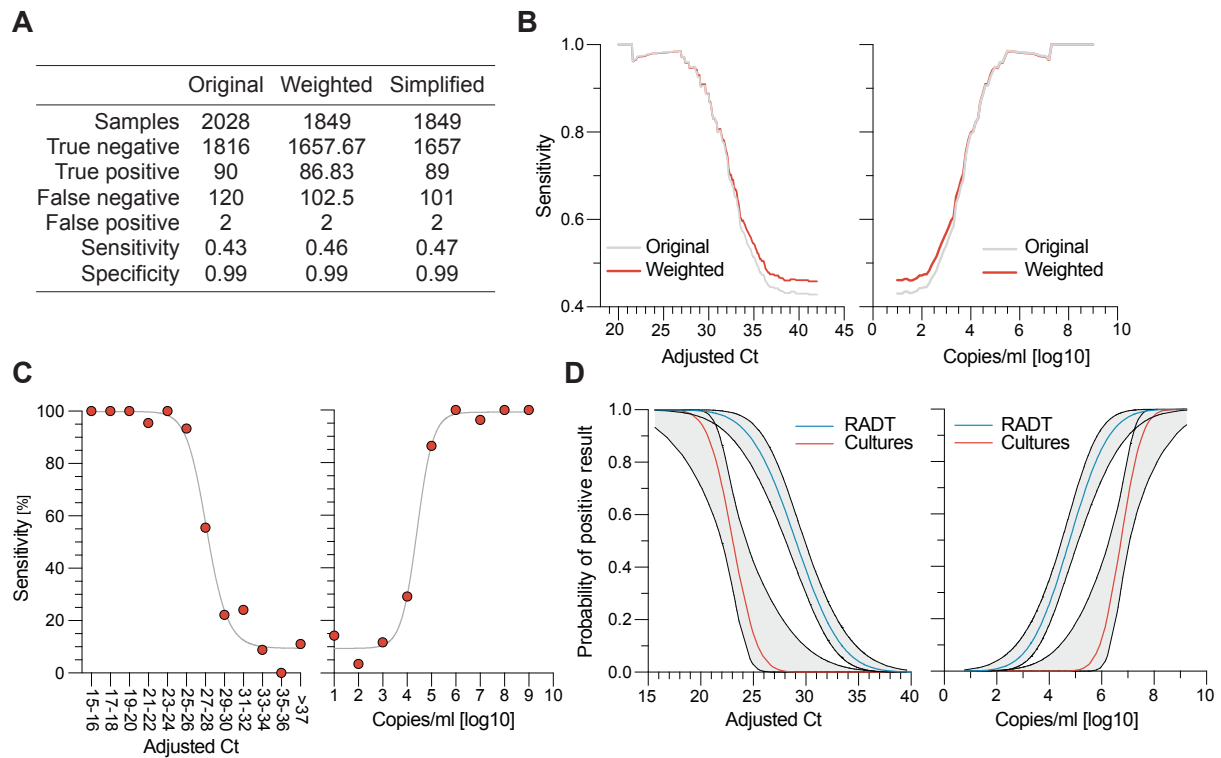

**Fig. S2. Modified data analyses to correct for repeated testing of single individuals.**

(A) Comparison of RADT performance data in either a weighted or simplified (only first swab result) fashion. (B) The cumulative sensitivity of the RADT is stratified by adjusted Ct values and RNA load in log copies/ml. (C) Sensitivity of RADT is stratified by adjusted Ct values and RNA load in log copies/ml for simplified analysis (only first swab result). (D) Probability of positive result for RADT and viral cultures in the context of adjusted Ct values and RNA load (Probit-Model, R-function GLMMadaptive). All weighted p-values remain  $p < 0.0001$ , Generalized Estimating Equations.
